# Supplementary material for: The mechanism of kinesin inhibition by kinesin-binding protein
Source: eLife journal article supplement (doi:10.7554/elife.61481), 2020-11-30

**Figure 5-figure supplement 1**

KBP

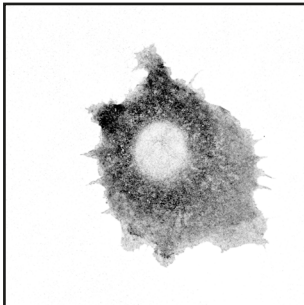

L1<sup>m</sup>

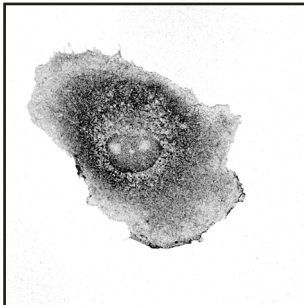

L3<sup>m</sup>

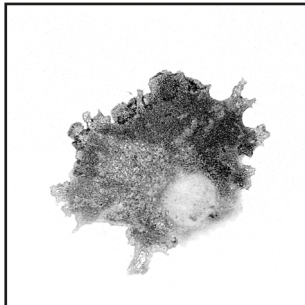

L5<sup>m</sup>

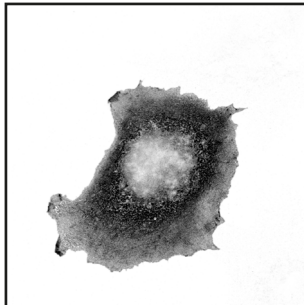

L10<sup>m</sup>

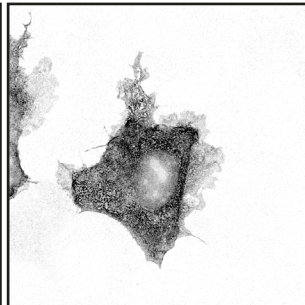

L12<sup>m</sup>

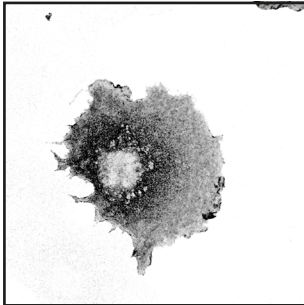

L14<sup>m</sup>

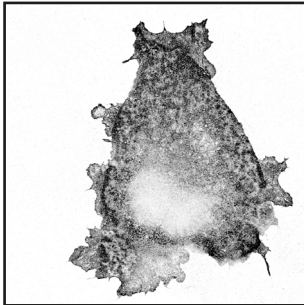

L16<sup>m</sup>

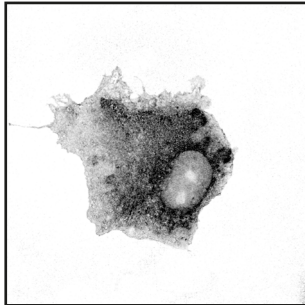

L18<sup>m</sup>

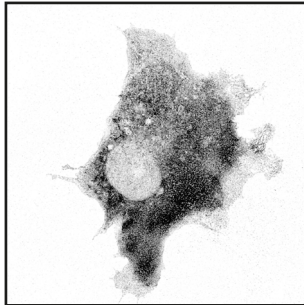

L10<sup>m</sup>+L12<sup>m</sup>

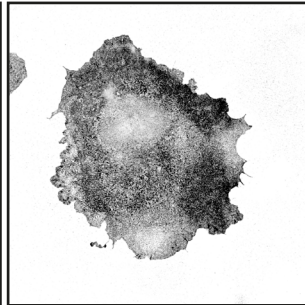

L10<sup>m</sup>+L14<sup>m</sup>

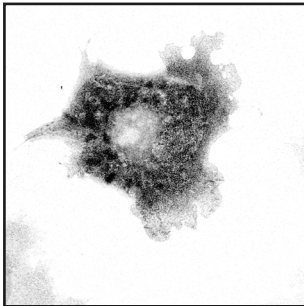

L12<sup>m</sup>+L14<sup>m</sup>

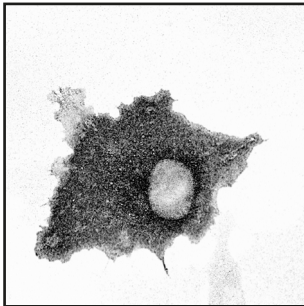

αHP4a<sup>m</sup>

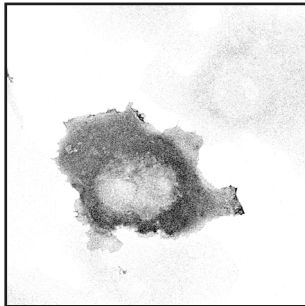

αHP4b<sup>m</sup>

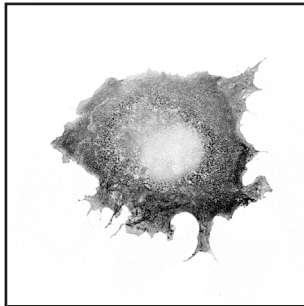

αHP5a<sup>m</sup>

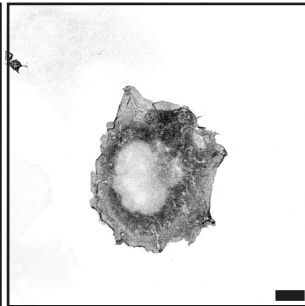

Supplement: supp [file elife-61481-supp-v1.zip]
