# Supplementary figures and images for: The mechanism of kinesin inhibition by kinesin-binding protein
Source: eLife journal article supplement (doi:10.7554/elife.61481), 2020-11-30

# Figure 2-figure supplement 1

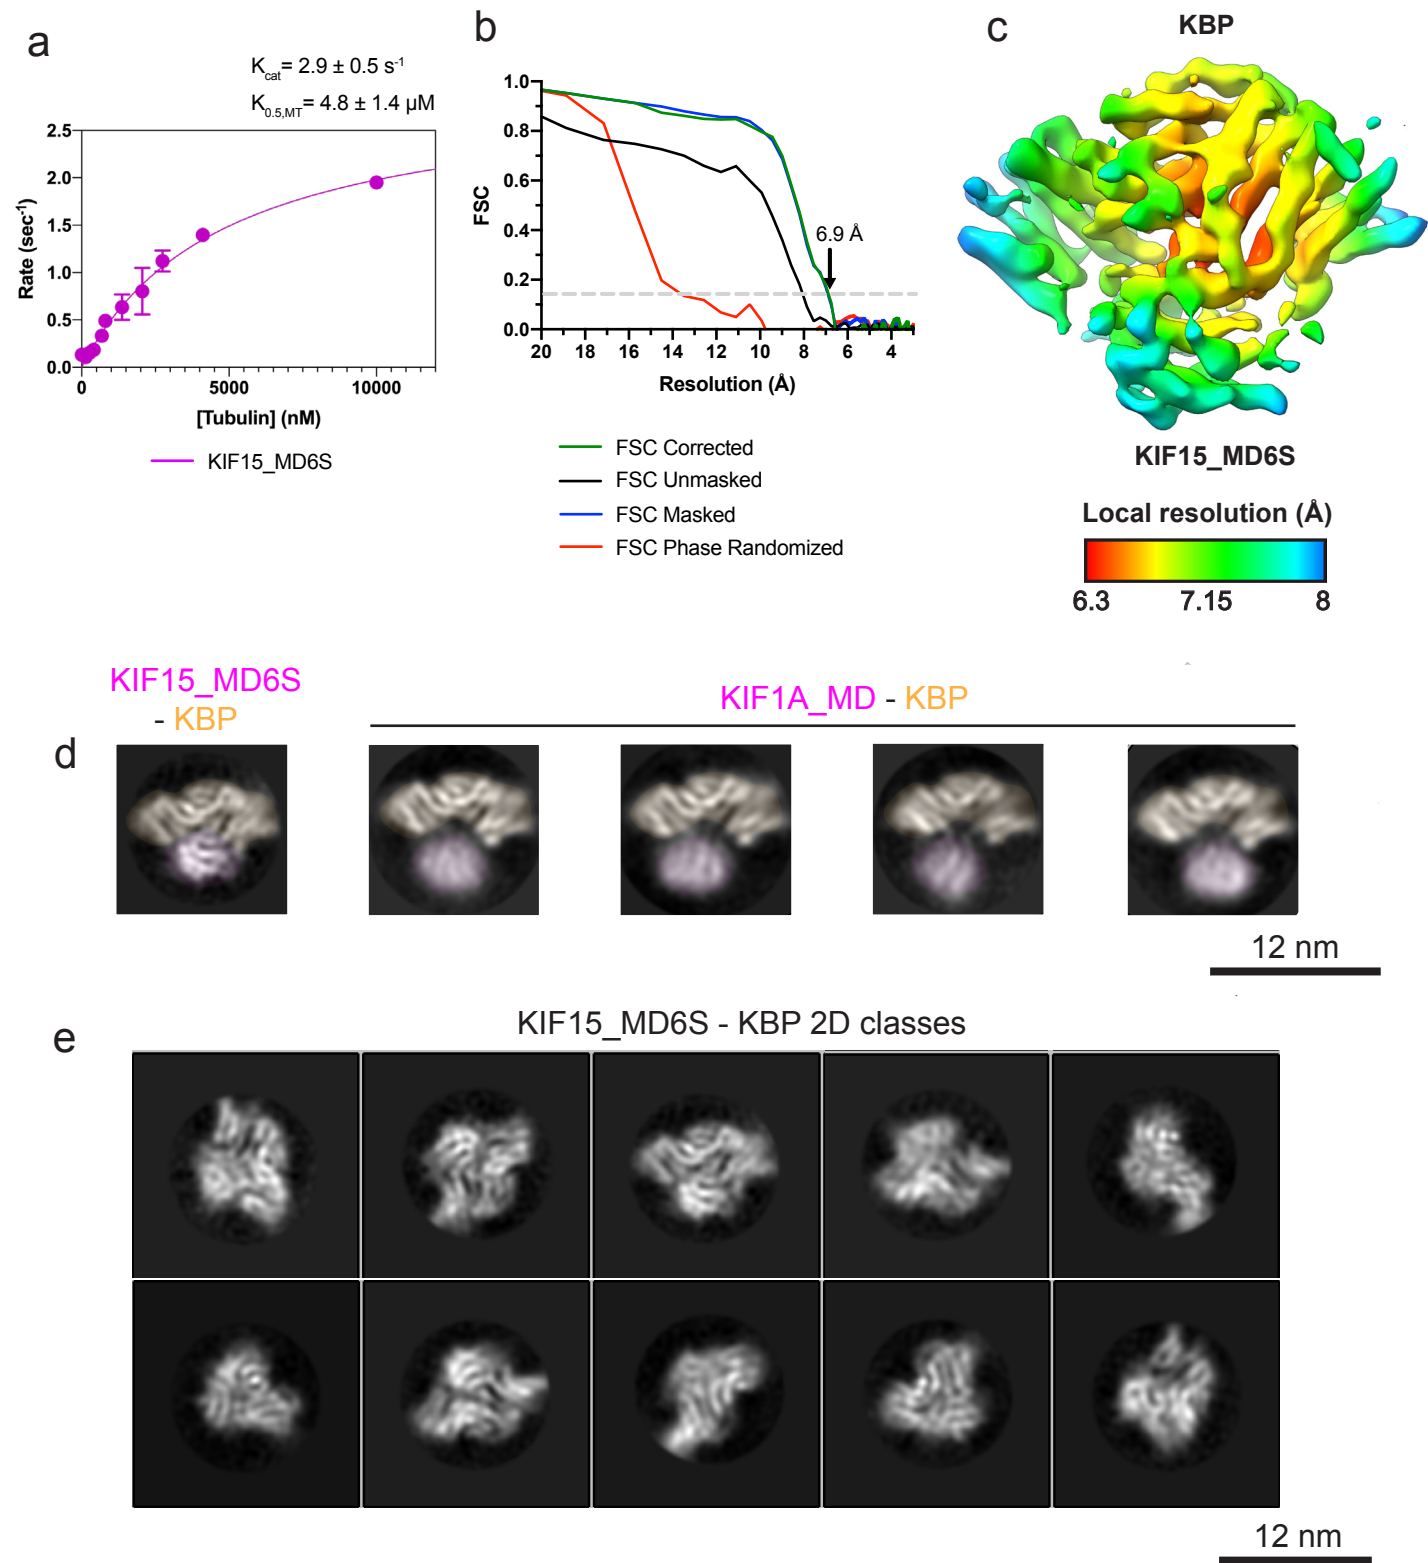

Supplement: supp [file elife-61481-supp-v1.zip]

**Figure 3-figure supplement 1**

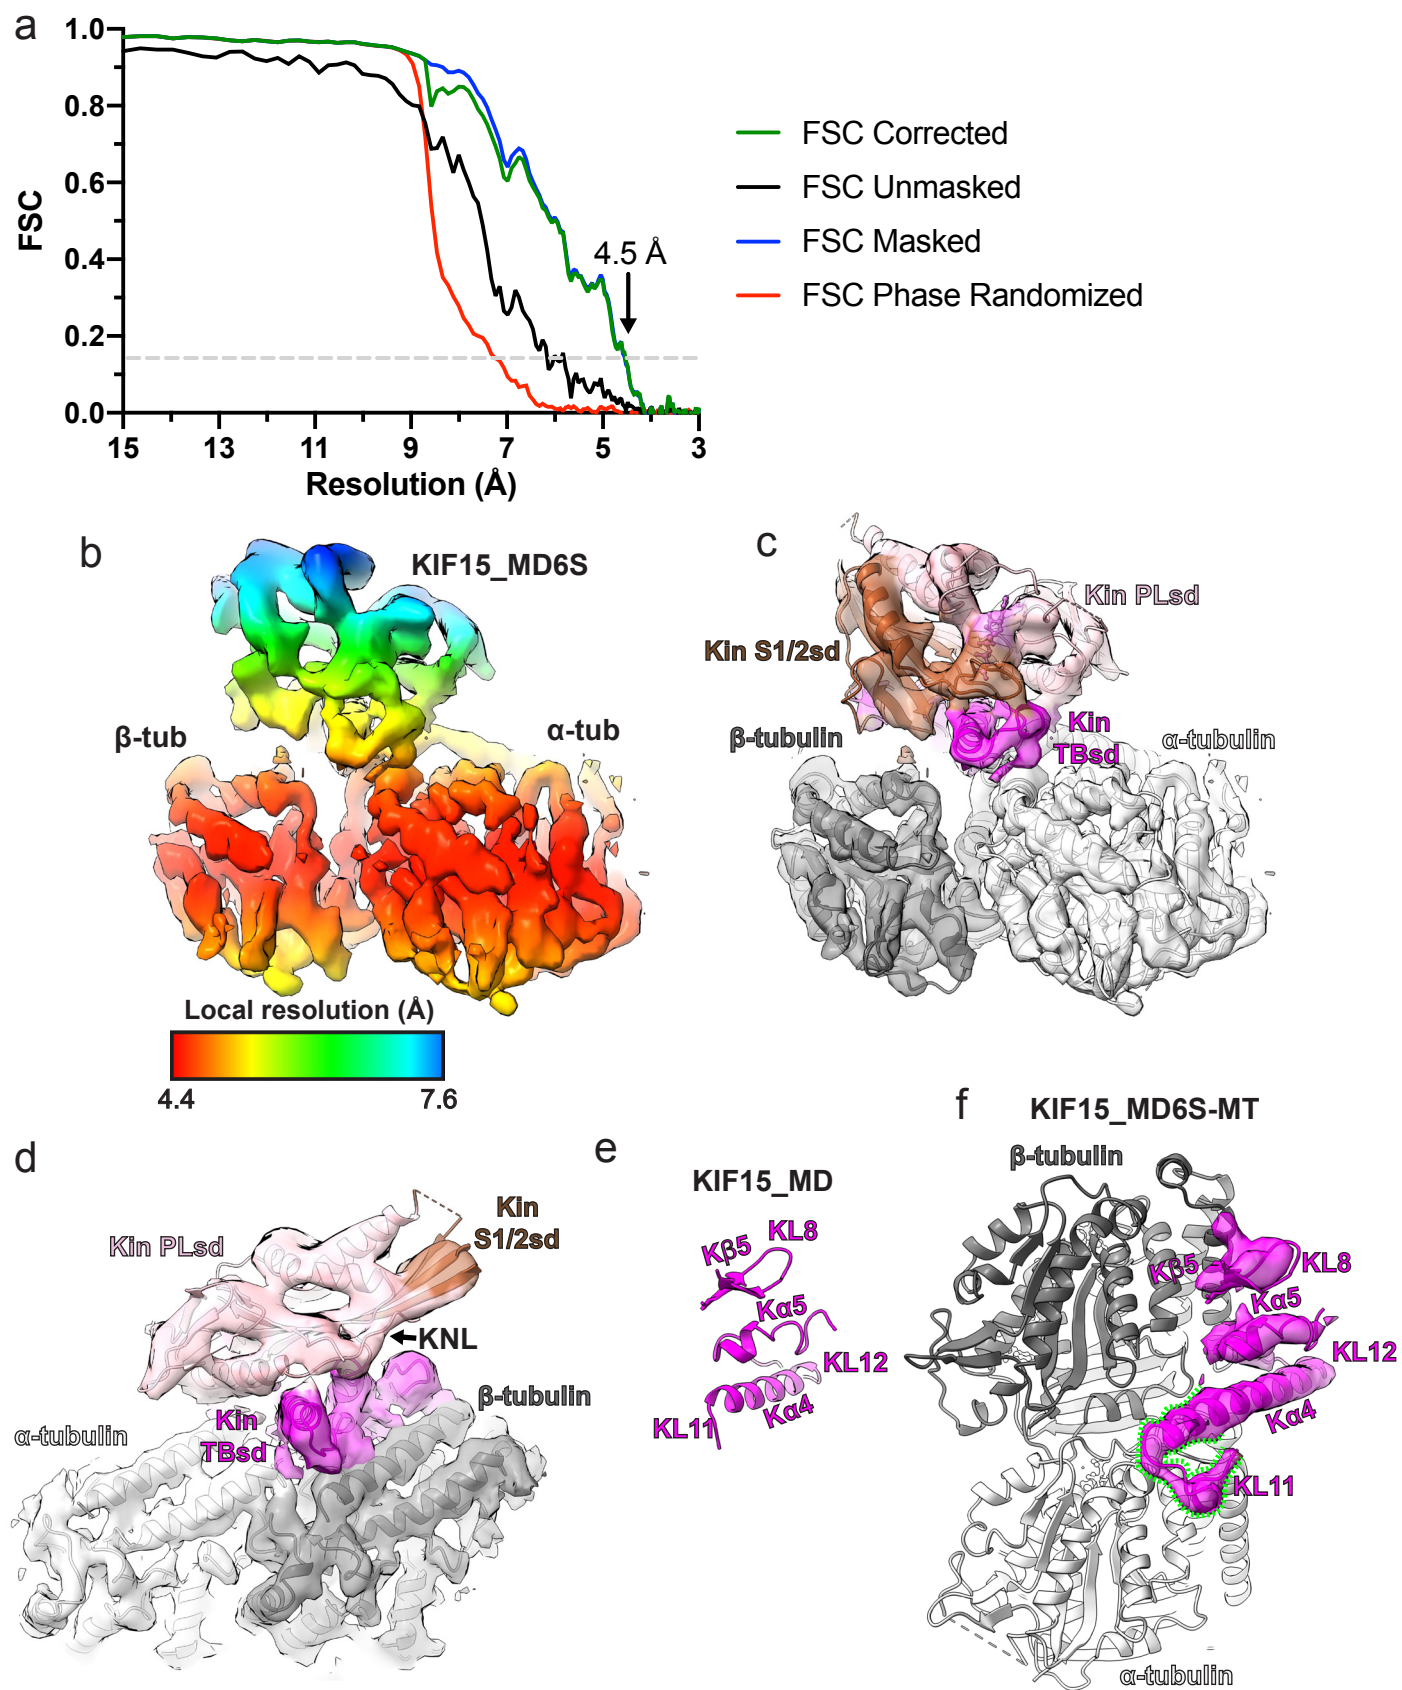

Supplement: supp [file elife-61481-supp-v1.zip]

**Figure 3-figure supplement 3**

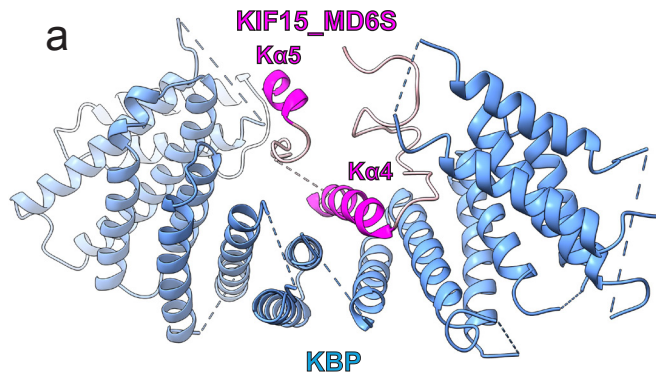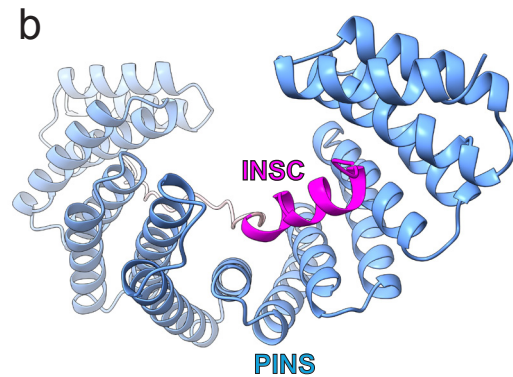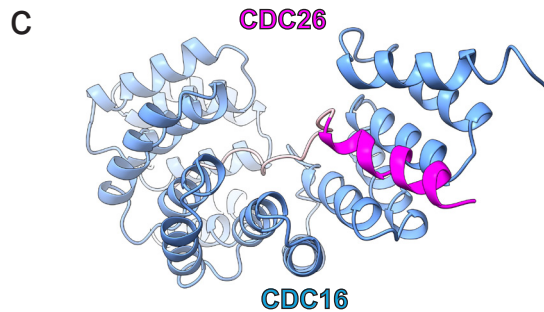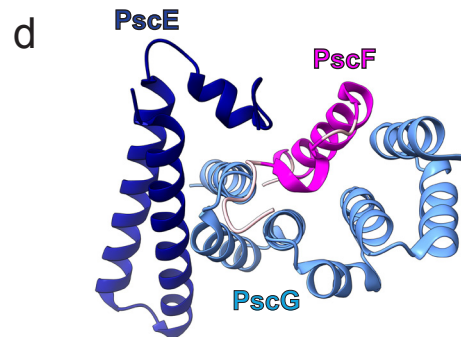

Supplement: supp [file elife-61481-supp-v1.zip]

# Figure 1-figure supplement 2

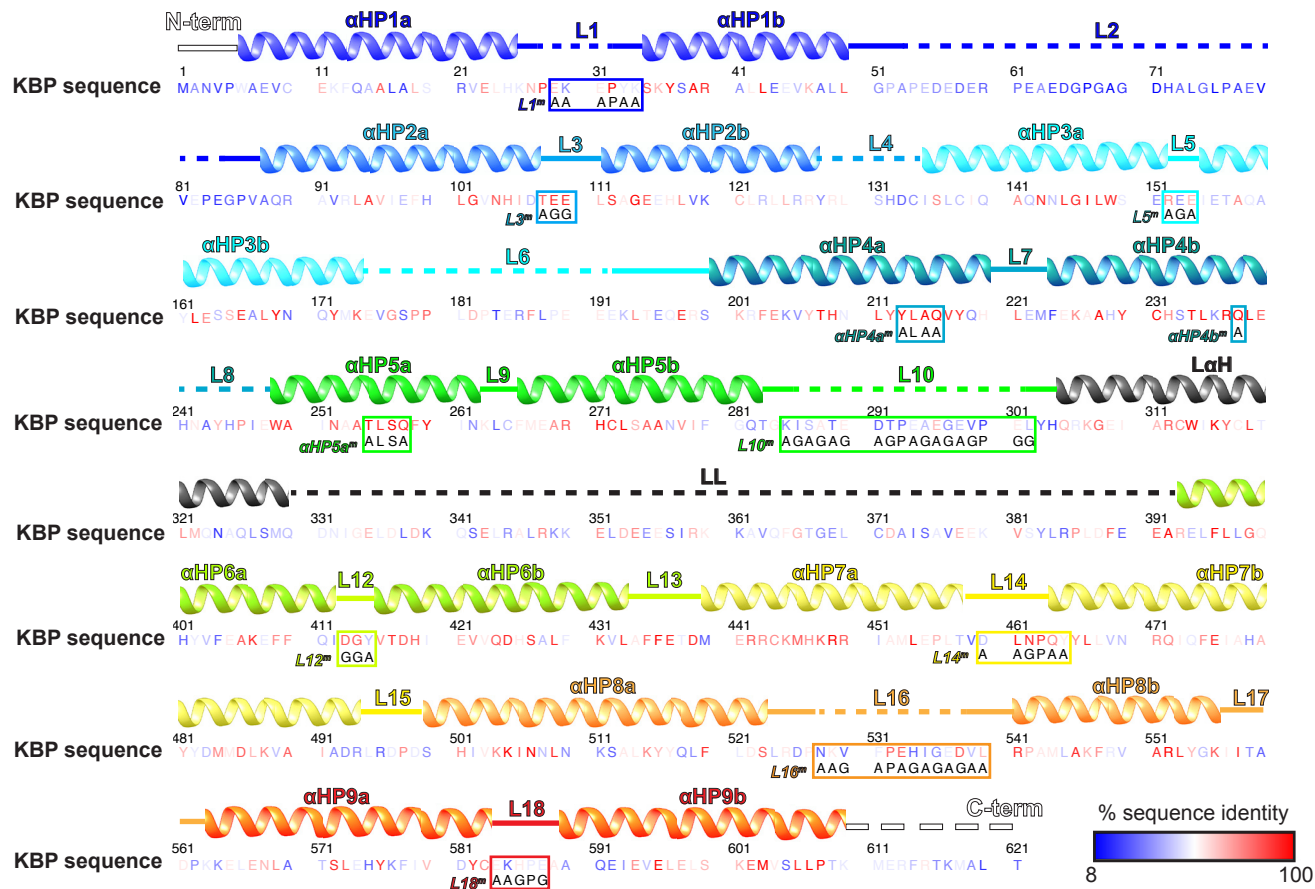

Supplement: supp [file elife-61481-supp-v1.zip]

**Figure 4-figure supplement 1**

**a**

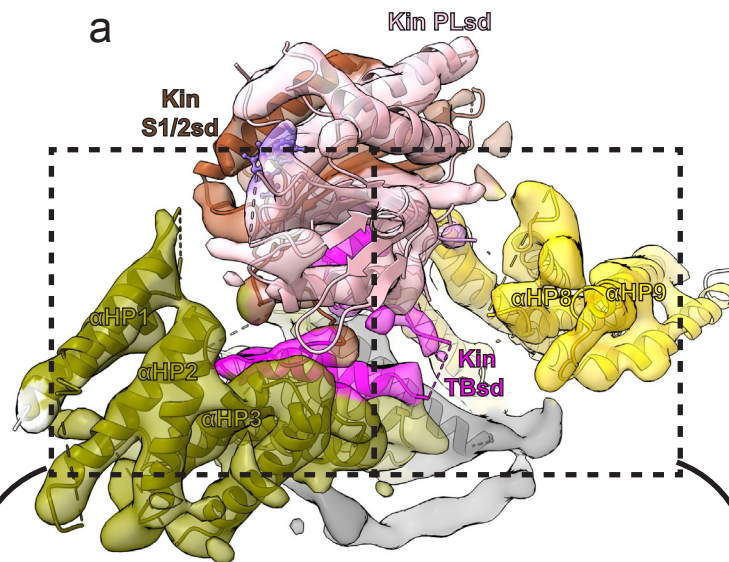

**b**

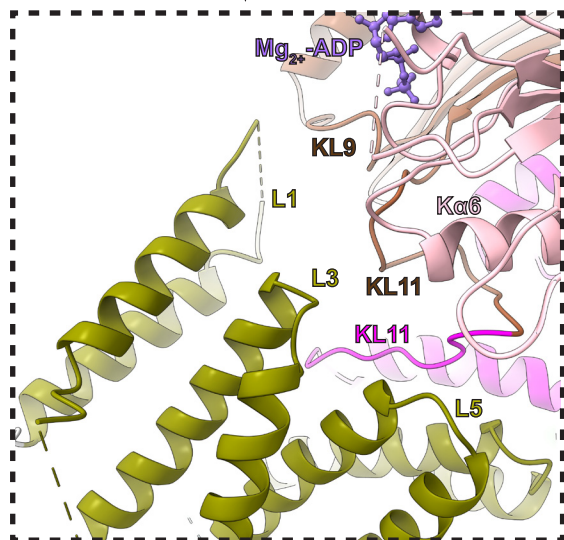

**c**

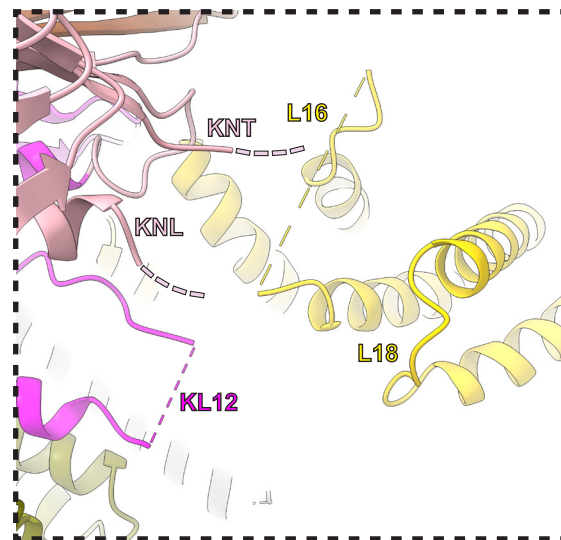

Supplement: supp [file elife-61481-supp-v1.zip]

# Figure 5-figure supplement 2

a

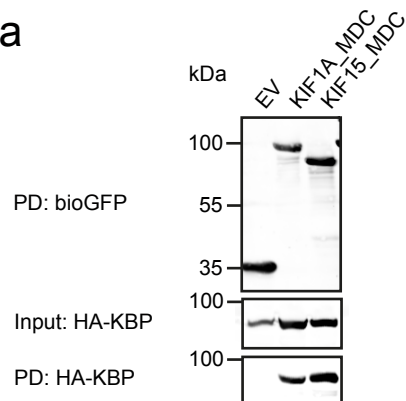

b

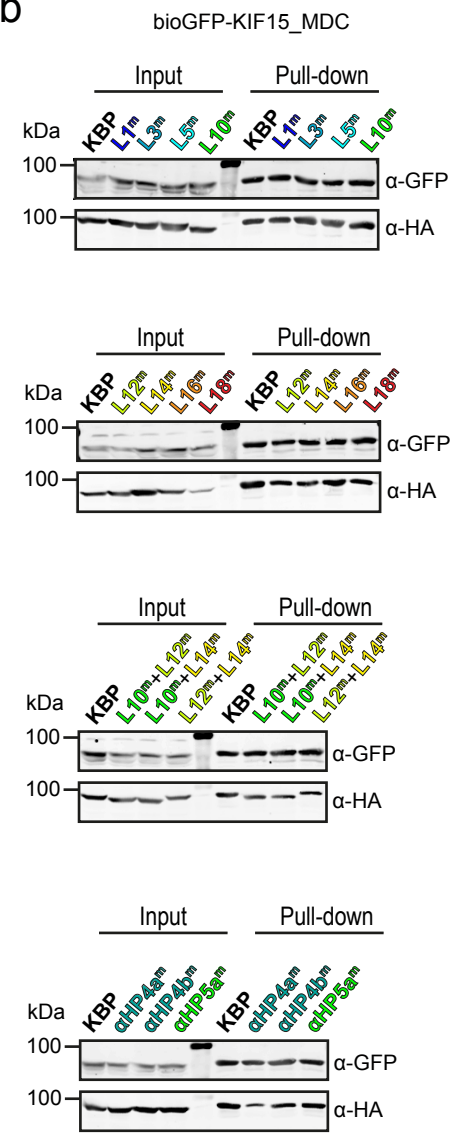

c

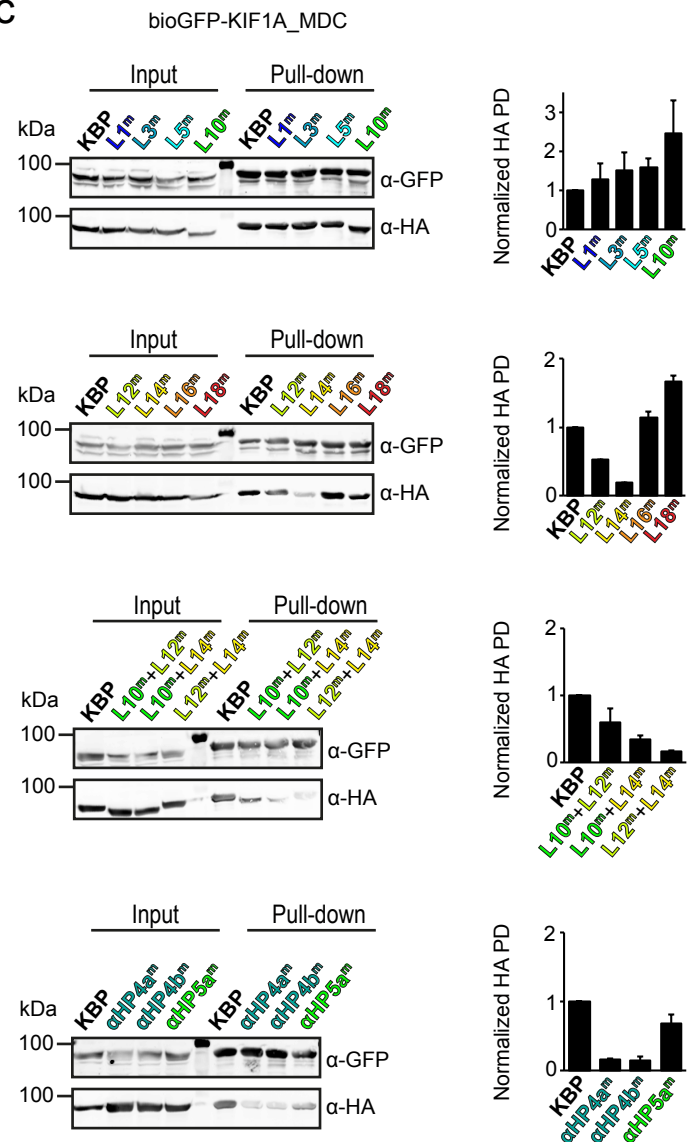

Supplement: supp [file elife-61481-supp-v1.zip]

# Figure 5-figure supplement 3

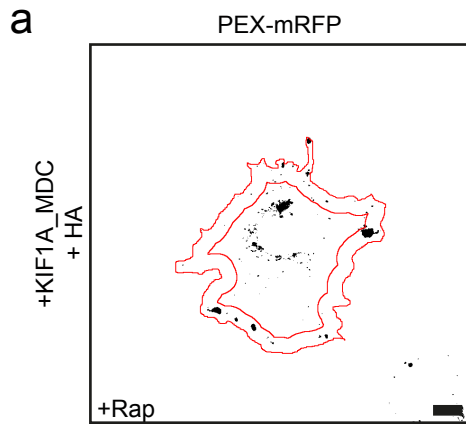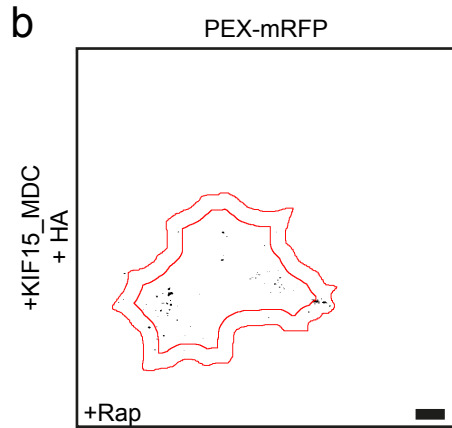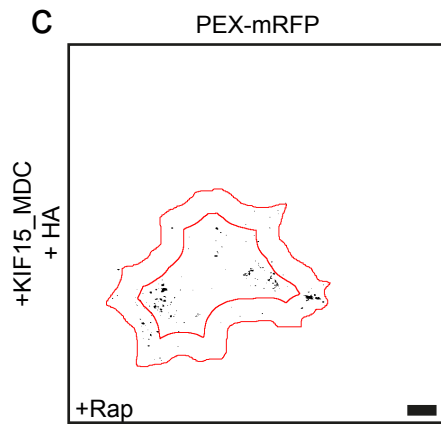

Supplement: supp [file elife-61481-supp-v1.zip]

**Figure 1-figure supplement 3**

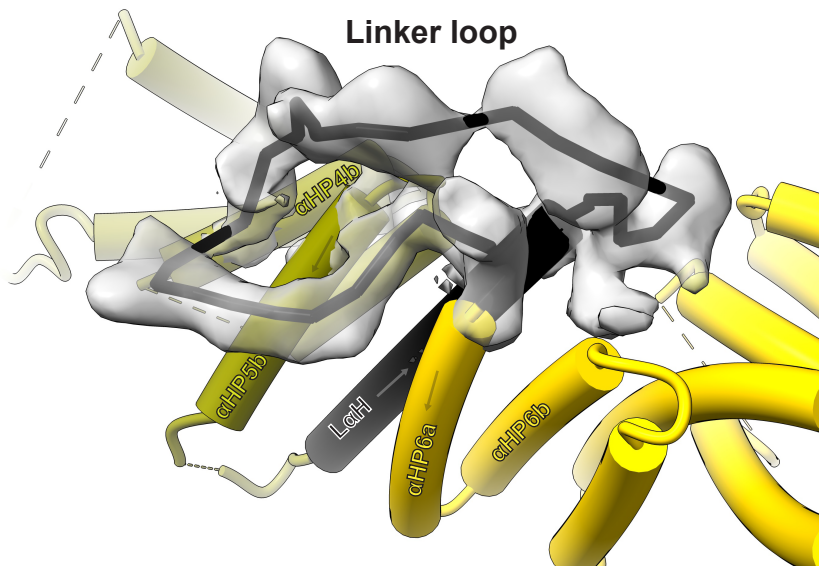

Supplement: supp [file elife-61481-supp-v1.zip]

**Figure 1-figure supplement 1**

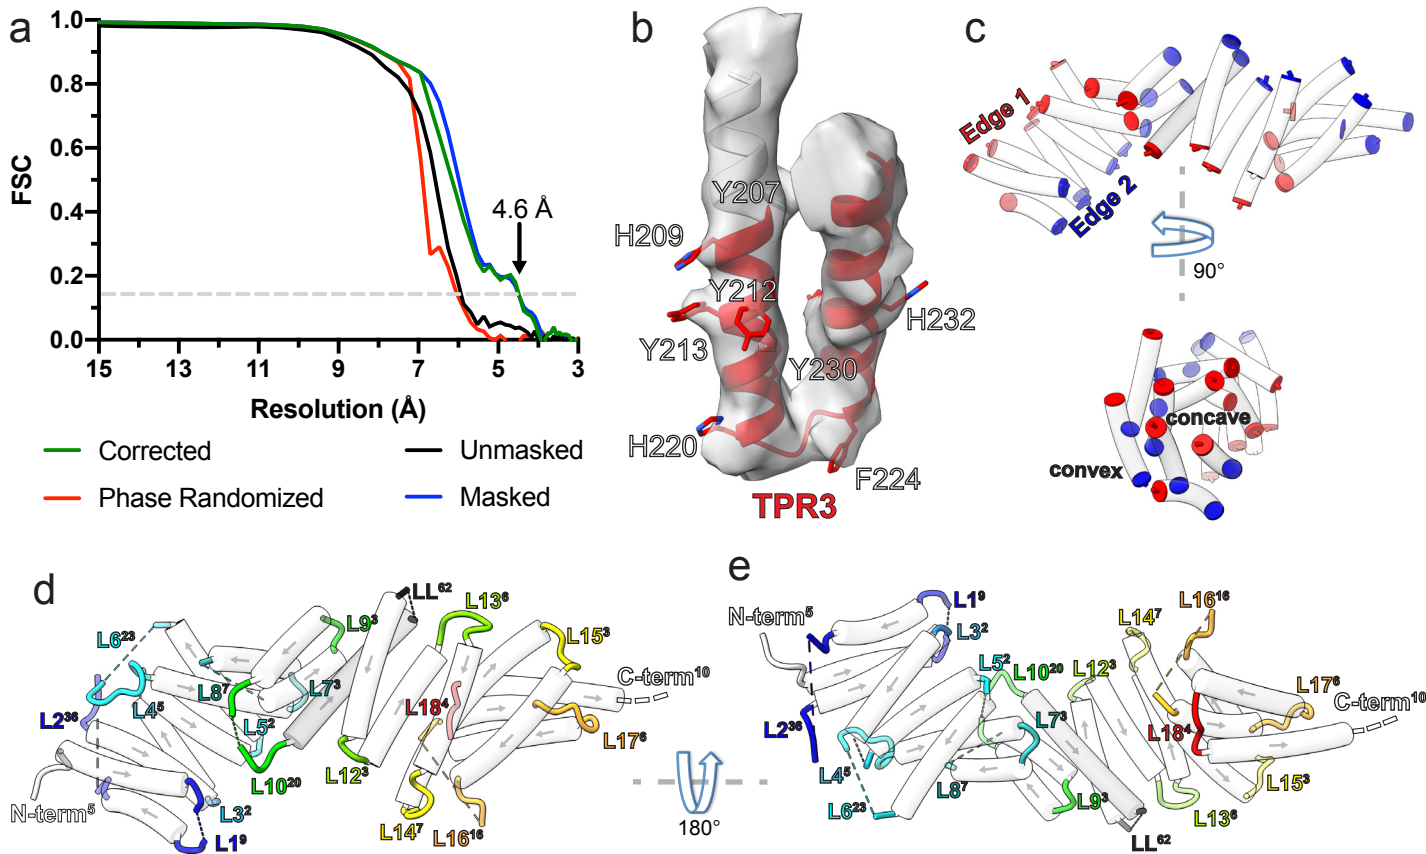

Supplement: supp [file elife-61481-supp-v1.zip]

**Figure 3-figure supplement 2**

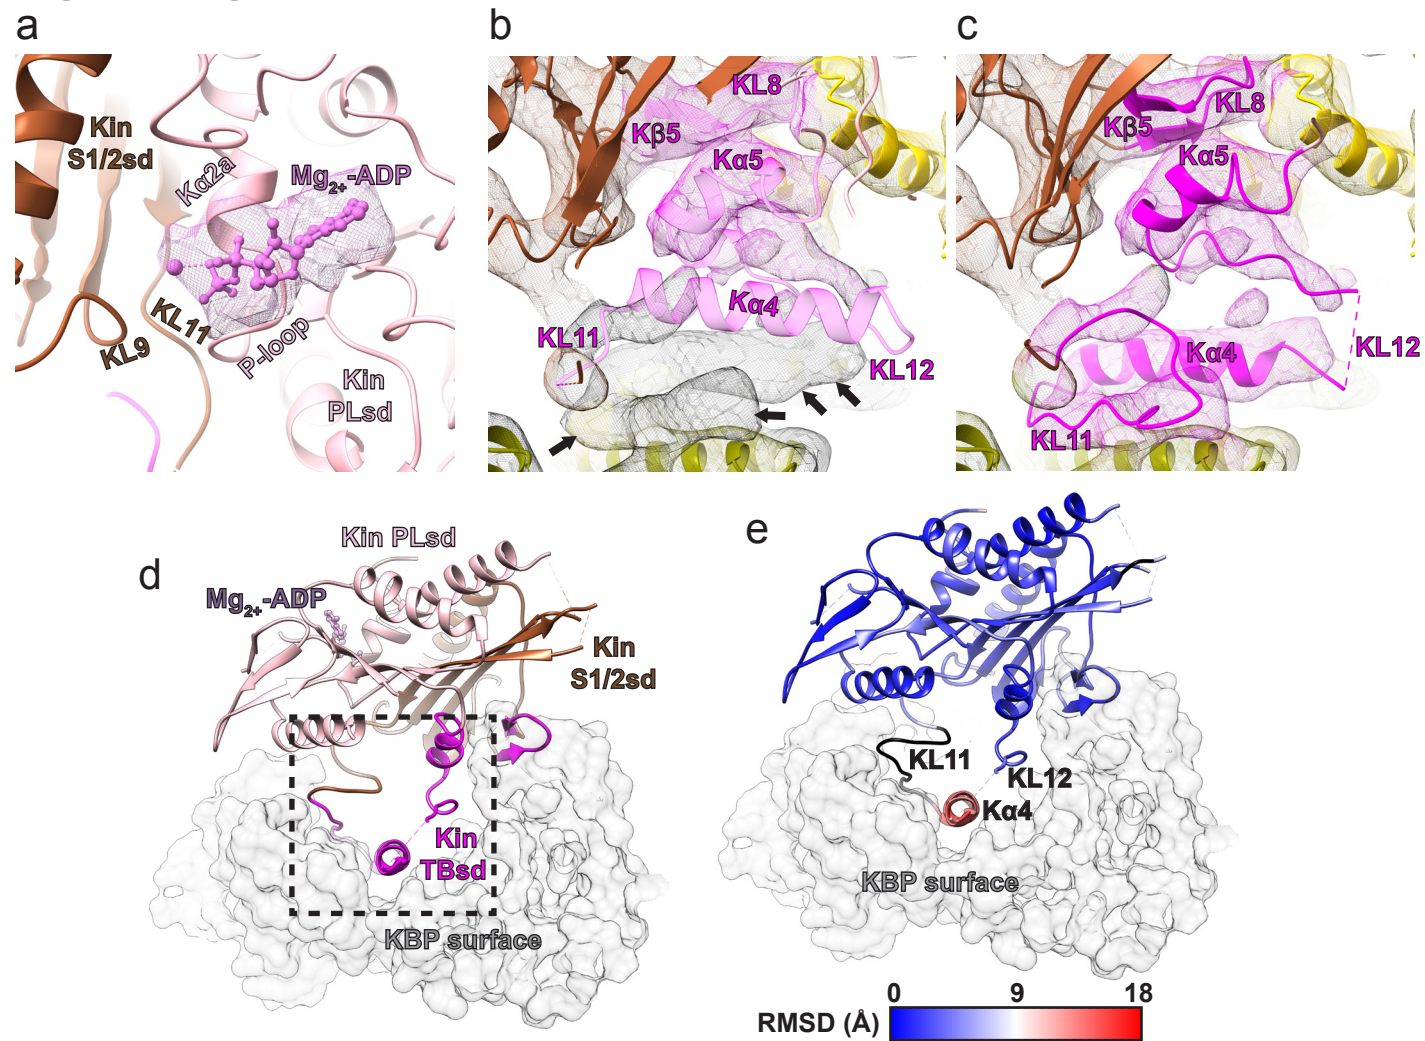

Supplement: supp [file elife-61481-supp-v1.zip]
